# Supplementary material for: Relationship between HbA1c, fructosamine and clinical assessment of glycemic control in dogs
Source: PubMed Central journal article supplement (PMC8880912; doi:10.1371/journal.pone.0264275), 2022-02-25
Supplement: pone.0264275.s002.pdf [file pone.0264275.s002.pdf]

## Owner information and Medical Record#

### EVALUATION OF DIABETES CONTROL – Make any additional notes on reverse

#### Patient history (All refer to changes over previous 4 weeks)

|                                           |                                                                     |
|-------------------------------------------|---------------------------------------------------------------------|
| Need for insulin adjustment               | Yes<br>No                                                           |
| Change in water consumption               | Yes-increased water consumption<br>No                               |
| Change in urine frequency/amount          | Yes<br>No                                                           |
| Change in appetite/food intake            | Change in appetite (increased)<br>No change in appetite             |
| Change in activity level                  | Change in activity level (decreased)<br>No change in activity level |
| Increase in body weight                   | Yes<br>No (no change/decrease)                                      |
| Signs of hypoglycemia noticed             | Yes<br>No                                                           |
| Required treatment for hypoglycemia       | Yes<br>No                                                           |
| Compliant with recommended insulin dosing | Yes<br>No                                                           |

#### Physical examination

|                               |                                                                        |
|-------------------------------|------------------------------------------------------------------------|
| Change body weight $\geq 5\%$ | Yes<br>No                                                              |
| Body condition score          | Unacceptable (poor body condition)<br>Acceptable (good body condition) |
| Hydration status              | Dehydrated<br>Normal hydration                                         |
